# Supplementary material for: A redox acceptor–acceptor nitro functionalized naphthalene diimide/rGO anode for sustainable lithium-ion batteries
Source: Royal Society of Chemistry journal article supplement (doi:10.1039/d3ya00561e), 2024-01-01
Supplement: d3ya00561e1.xlsx [file d3ya00561e1.xlsx]

## Sheet: 50mAg
0	2.996
0	2.9113
0	2.9066
0.41	2.78
0.83	2.7097
1.24	2.6553
1.66	2.6091
2.07	2.5685
2.49	2.5323
2.9	2.4989
3.31	2.4681
3.73	2.4395
4.14	2.413
4.56	2.3877
4.97	2.3639
5.39	2.3414
5.8	2.32
6.21	2.2997
6.63	2.2803
7.04	2.2618
7.46	2.2439
7.87	2.2268
8.29	2.2103
8.7	2.1942
9.11	2.1785
9.53	2.1633
9.94	2.1485
10.36	2.1343
10.77	2.1203
11.18	2.1066
11.6	2.0933
12.01	2.0802
12.43	2.0675
12.84	2.0551
13.26	2.043
13.67	2.0315
14.08	2.0201
14.5	2.0089
14.91	1.9979
15.33	1.9875
15.74	1.9771
16.16	1.9668
16.57	1.9568
16.98	1.9469
17.4	1.9372
17.81	1.9278
18.23	1.9184
18.64	1.9092
19.06	1.9002
19.47	1.8915
19.88	1.8829
20.3	1.8745
20.71	1.8662
21.13	1.8581
21.54	1.8501
21.95	1.8422
22.37	1.8343
22.78	1.8268
23.2	1.8193
23.61	1.8118
24.03	1.8046
24.44	1.7975
24.85	1.7904
25.27	1.7834
25.68	1.7766
26.1	1.7699
26.51	1.7633
26.92	1.7566
27.34	1.7501
27.75	1.7437
28.17	1.7373
28.58	1.731
29	1.7247
29.41	1.7186
29.82	1.7125
30.24	1.7064
30.65	1.7004
31.07	1.6944
31.48	1.6886
31.89	1.6826
32.31	1.6767
32.72	1.6711
33.14	1.6653
33.55	1.6596
33.97	1.6539
34.38	1.6483
34.79	1.6428
35.21	1.6372
35.62	1.6317
36.04	1.6263
36.45	1.6208
36.86	1.6154
37.28	1.6099
37.69	1.6045
38.11	1.5992
38.52	1.5939
38.93	1.5885
39.35	1.5831
39.76	1.578
40.18	1.5727
40.59	1.5674
41.01	1.5622
41.42	1.557
41.83	1.5519
42.25	1.5467
42.66	1.5415
43.08	1.5365
43.49	1.5312
43.9	1.5263
44.32	1.5212
44.73	1.5162
45.15	1.5113
45.56	1.5063
45.98	1.5014
46.39	1.4964
46.8	1.4915
47.22	1.4864
47.63	1.4815
48.05	1.4765
48.46	1.4716
48.87	1.4666
49.29	1.4617
49.7	1.4569
50.12	1.4521
50.53	1.4472
50.94	1.4424
51.36	1.4376
51.77	1.4328
52.19	1.4282
52.6	1.4234
53.02	1.4186
53.43	1.414
53.84	1.4092
54.26	1.4044
54.67	1.3998
55.09	1.395
55.5	1.3904
55.91	1.3858
56.33	1.3811
56.74	1.3766
57.16	1.372
57.57	1.3675
57.98	1.363
58.4	1.3584
58.81	1.3539
59.23	1.3493
59.64	1.3448
60.06	1.3404
60.47	1.3361
60.88	1.3318
61.3	1.3275
61.71	1.3232
62.13	1.3189
62.54	1.3149
62.95	1.3107
63.37	1.3064
63.78	1.3022
64.2	1.298
64.61	1.2939
65.02	1.2897
65.44	1.2854
65.85	1.2813
66.27	1.2771
66.68	1.273
67.1	1.2687
67.51	1.2647
67.92	1.2604
68.34	1.2563
68.75	1.252
69.17	1.2479
69.58	1.2438
69.99	1.2397
70.41	1.2356
70.82	1.2316
71.24	1.2275
71.65	1.2234
72.07	1.2194
72.48	1.2153
72.89	1.2115
73.31	1.2074
73.72	1.2035
74.14	1.1994
74.55	1.1954
74.96	1.1914
75.38	1.1875
75.79	1.1836
76.21	1.1795
76.62	1.1757
77.04	1.1717
77.45	1.1678
77.86	1.164
78.28	1.16
78.69	1.1562
79.11	1.1523
79.52	1.1485
79.94	1.1447
80.35	1.1408
80.76	1.137
81.18	1.1332
81.59	1.1294
82.01	1.1257
82.42	1.1218
82.84	1.1183
83.25	1.1144
83.66	1.1107
84.08	1.1069
84.49	1.1034
84.91	1.0995
85.32	1.0959
85.73	1.0921
86.15	1.0885
86.56	1.0848
86.98	1.0812
87.39	1.0776
87.81	1.0739
88.22	1.0704
88.63	1.0667
89.05	1.063
89.46	1.0597
89.88	1.056
90.29	1.0524
90.71	1.0488
91.12	1.0453
91.53	1.0418
91.95	1.0382
92.36	1.0346
92.78	1.0312
93.19	1.0277
93.61	1.0242
94.02	1.0207
94.43	1.0174
94.85	1.0139
95.26	1.0105
95.68	1.007
96.09	1.0038
96.51	1.0003
96.92	0.9969
97.33	0.9935
97.75	0.9901
98.16	0.9867
98.58	0.9834
98.99	0.9801
99.41	0.9767
99.82	0.9733
100.23	0.9699
100.65	0.9667
101.06	0.9633
101.48	0.96
101.89	0.9567
102.31	0.9534
102.72	0.9502
103.14	0.9469
103.55	0.9435
103.96	0.9403
104.38	0.937
104.79	0.9338
105.21	0.9306
105.62	0.9274
106.04	0.9242
106.45	0.921
106.86	0.9177
107.28	0.9145
107.69	0.9113
108.11	0.9081
108.52	0.9048
108.94	0.9018
109.35	0.8987
109.76	0.8954
110.18	0.8922
110.59	0.8891
111.01	0.8859
111.42	0.8828
111.84	0.8797
112.25	0.8766
112.67	0.8735
113.08	0.8705
113.49	0.8673
113.91	0.8643
114.32	0.8612
114.74	0.8581
115.15	0.8551
115.57	0.852
115.98	0.849
116.39	0.846
116.81	0.843
117.22	0.8399
117.64	0.8369
118.05	0.8339
118.47	0.8309
118.88	0.828
119.29	0.8249
119.71	0.822
120.12	0.8191
120.54	0.816
120.95	0.8132
121.37	0.8103
121.78	0.8073
122.2	0.8044
122.61	0.8014
123.02	0.7986
123.44	0.7958
123.85	0.793
124.27	0.79
124.68	0.7872
125.1	0.7844
125.51	0.7815
125.93	0.7789
126.34	0.776
126.75	0.7731
127.17	0.7704
127.58	0.7676
128	0.7648
128.41	0.7621
128.83	0.7594
129.24	0.7566
129.65	0.7537
130.07	0.7511
130.48	0.7484
130.9	0.7457
131.31	0.743
131.73	0.7403
132.14	0.7377
132.56	0.735
132.97	0.7324
133.38	0.7298
133.8	0.7272
134.21	0.7246
134.63	0.722
135.04	0.7193
135.46	0.7168
135.87	0.7142
136.29	0.7116
136.7	0.7091
137.11	0.7065
137.53	0.704
137.94	0.7015
138.36	0.6989
138.77	0.6965
139.19	0.694
139.6	0.6914
140.02	0.6889
140.43	0.6864
140.84	0.684
141.26	0.6817
141.67	0.6791
142.09	0.6768
142.5	0.6744
142.92	0.672
143.33	0.6696
143.75	0.6673
144.16	0.6649
144.57	0.6625
144.99	0.6602
145.4	0.6579
145.82	0.6556
146.23	0.6532
146.65	0.6509
147.06	0.6487
147.48	0.6464
147.89	0.6441
148.3	0.6418
148.72	0.6397
149.13	0.6374
149.55	0.6352
149.96	0.6331
150.38	0.6308
150.79	0.6285
151.21	0.6264
151.62	0.6242
152.03	0.6222
152.45	0.6199
152.86	0.6178
153.28	0.6156
153.69	0.6136
154.11	0.6114
154.52	0.6093
154.94	0.6072
155.35	0.6051
155.76	0.603
156.18	0.601
156.59	0.5989
157.01	0.5969
157.42	0.5949
157.84	0.5928
158.25	0.5908
158.67	0.5889
159.08	0.5869
159.49	0.5849
159.91	0.583
160.32	0.581
160.74	0.579
161.15	0.577
161.57	0.5752
161.98	0.5733
162.4	0.5713
162.81	0.5694
163.22	0.5677
163.64	0.5658
164.05	0.5637
164.47	0.562
164.88	0.5602
165.3	0.5584
165.71	0.5566
166.13	0.5548
166.54	0.553
166.95	0.5512
167.37	0.5494
167.78	0.5475
168.2	0.5458
168.61	0.544
169.03	0.5422
169.44	0.5405
169.86	0.5388
170.27	0.5371
170.68	0.5353
171.1	0.5336
171.51	0.5319
171.93	0.5303
172.34	0.5287
172.76	0.5269
173.17	0.5252
173.59	0.5237
174	0.522
174.42	0.5204
174.83	0.5188
175.24	0.5172
175.66	0.5156
176.07	0.5139
176.49	0.5125
176.9	0.511
177.32	0.5094
177.73	0.5079
178.15	0.5065
178.56	0.505
178.97	0.5036
179.39	0.5022
179.8	0.5008
180.22	0.4994
180.63	0.4979
181.05	0.4966
181.46	0.4953
181.88	0.4939
182.29	0.4925
182.7	0.4911
183.12	0.4898
183.53	0.4885
183.95	0.4872
184.36	0.4859
184.78	0.4846
185.19	0.4832
185.61	0.4819
186.02	0.4806
186.43	0.4792
186.85	0.478
187.26	0.4766
187.68	0.4753
188.09	0.474
188.51	0.4727
188.92	0.4713
189.34	0.47
189.75	0.4686
190.17	0.4673
190.58	0.4659
190.99	0.4645
191.41	0.4631
191.82	0.4617
192.24	0.4605
192.65	0.4591
193.07	0.4577
193.48	0.4563
193.9	0.4549
194.31	0.4536
194.73	0.4521
195.14	0.4508
195.55	0.4494
195.97	0.4481
196.38	0.4469
196.8	0.4455
197.21	0.4442
197.63	0.4429
198.04	0.4415
198.46	0.4403
198.87	0.4389
199.29	0.4378
199.7	0.4365
200.11	0.4353
200.53	0.4341
200.94	0.4329
201.36	0.4317
201.77	0.4305
202.19	0.4292
202.6	0.428
203.02	0.4269
203.43	0.4257
203.85	0.4246
204.26	0.4234
204.67	0.4223
205.09	0.4211
205.5	0.42
205.92	0.419
206.33	0.4179
206.75	0.4168
207.16	0.4157
207.58	0.4147
207.99	0.4137
208.4	0.4127
208.82	0.4116
209.23	0.4106
209.65	0.4094
210.06	0.4084
210.48	0.4075
210.89	0.4065
211.31	0.4055
211.72	0.4045
212.14	0.4035
212.55	0.4025
212.96	0.4015
213.38	0.4005
213.79	0.3994
214.21	0.3984
214.62	0.3975
215.04	0.3965
215.45	0.3954
215.87	0.3945
216.28	0.3935
216.69	0.3924
217.11	0.3914
217.52	0.3906
217.94	0.3896
218.35	0.3886
218.77	0.3878
219.18	0.3868
219.6	0.3859
220.01	0.3849
220.42	0.384
220.84	0.3831
221.25	0.3821
221.67	0.3812
222.08	0.3802
222.5	0.3792
222.91	0.3783
223.33	0.3775
223.74	0.3766
224.15	0.3756
224.57	0.3748
224.98	0.374
225.4	0.3731
225.81	0.3722
226.23	0.3712
226.64	0.3705
227.06	0.3696
227.47	0.3686
227.88	0.3677
228.3	0.3669
228.71	0.366
229.13	0.3652
229.54	0.3642
229.96	0.3633
230.37	0.3624
230.79	0.3617
231.2	0.3607
231.62	0.3599
232.03	0.3591
232.44	0.3582
232.86	0.3575
233.27	0.3566
233.69	0.3559
234.1	0.355
234.52	0.3542
234.93	0.3536
235.35	0.3529
235.76	0.3522
236.17	0.3514
236.59	0.3507
237	0.3501
237.42	0.3495
237.83	0.3487
238.25	0.348
238.66	0.3474
239.08	0.3467
239.49	0.3461
239.9	0.3454
240.32	0.3448
240.73	0.344
241.15	0.3434
241.56	0.3427
241.98	0.342
242.39	0.3412
242.81	0.3406
243.22	0.3398
243.64	0.3391
244.05	0.3384
244.46	0.3376
244.88	0.337
245.29	0.3362
245.71	0.3355
246.12	0.3347
246.54	0.3341
246.95	0.3333
247.37	0.3326
247.78	0.3319
248.19	0.331
248.61	0.3304
249.02	0.3296
249.44	0.3289
249.85	0.3283
250.27	0.3274
250.68	0.3267
251.1	0.3259
251.51	0.3252
251.93	0.3244
252.34	0.3237
252.75	0.323
253.17	0.3223
253.58	0.3216
254	0.3208
254.41	0.3201
254.83	0.3194
255.24	0.3187
255.66	0.318
256.07	0.3173
256.49	0.3165
256.9	0.3158
257.31	0.315
257.73	0.3143
258.14	0.3136
258.56	0.3128
258.97	0.3122
259.39	0.3114
259.8	0.3107
260.22	0.3098
260.63	0.3091
261.05	0.3084
261.46	0.3077
261.87	0.307
262.29	0.3062
262.7	0.3055
263.12	0.3049
263.53	0.3041
263.95	0.3033
264.36	0.3026
264.78	0.3019
265.19	0.3012
265.61	0.3005
266.02	0.2998
266.44	0.299
266.85	0.2983
267.26	0.2976
267.68	0.2968
268.09	0.2961
268.51	0.2953
268.92	0.2946
269.34	0.2939
269.75	0.2931
270.17	0.2925
270.58	0.2918
271	0.2911
271.41	0.2904
271.83	0.2897
272.24	0.289
272.65	0.2881
273.07	0.2876
273.48	0.2868
273.9	0.2861
274.31	0.2854
274.73	0.2847
275.14	0.2839
275.56	0.2833
275.97	0.2826
276.39	0.2819
276.8	0.2812
277.22	0.2805
277.63	0.2799
278.04	0.2791
278.46	0.2785
278.87	0.2778
279.29	0.2772
279.7	0.2764
280.12	0.2757
280.53	0.275
280.95	0.2744
281.36	0.2737
281.78	0.273
282.19	0.2724
282.61	0.2716
283.02	0.271
283.43	0.2703
283.85	0.2696
284.26	0.2689
284.68	0.2683
285.09	0.2678
285.51	0.267
285.92	0.2664
286.34	0.2657
286.75	0.2651
287.17	0.2646
287.58	0.264
288	0.2634
288.41	0.2629
288.83	0.2624
289.24	0.2617
289.65	0.2613
290.07	0.2607
290.48	0.2601
290.9	0.2595
291.31	0.2589
291.73	0.2583
292.14	0.2576
292.56	0.257
292.97	0.2564
293.39	0.2558
293.8	0.2551
294.22	0.2544
294.63	0.2538
295.04	0.2531
295.46	0.2524
295.87	0.2518
296.29	0.251
296.7	0.2506
297.12	0.2497
297.53	0.2491
297.95	0.2484
298.36	0.2478
298.78	0.2471
299.19	0.2465
299.61	0.2459
300.02	0.2452
300.44	0.2446
300.85	0.244
301.26	0.2433
301.68	0.2427
302.09	0.2421
302.51	0.2414
302.92	0.2408
303.34	0.2402
303.75	0.2395
304.17	0.2389
304.58	0.2383
305	0.2378
305.41	0.2372
305.83	0.2365
306.24	0.236
306.66	0.2354
307.07	0.2348
307.49	0.2343
307.9	0.2337
308.31	0.2331
308.73	0.2325
309.14	0.2319
309.56	0.2313
309.97	0.2307
310.39	0.2301
310.8	0.2297
311.22	0.2291
311.63	0.2285
312.05	0.2279
312.46	0.2273
312.88	0.2268
313.29	0.2263
313.71	0.2256
314.12	0.2252
314.53	0.2245
314.95	0.2241
315.36	0.2236
315.78	0.223
316.19	0.2225
316.61	0.2219
317.02	0.2215
317.44	0.221
317.85	0.2204
318.27	0.2199
318.68	0.2193
319.1	0.2189
319.51	0.2183
319.93	0.2177
320.34	0.2174
320.75	0.2168
321.17	0.2162
321.58	0.2157
322	0.2152
322.41	0.2147
322.83	0.2141
323.24	0.2136
323.66	0.2131
324.07	0.2125
324.49	0.212
324.9	0.2115
325.32	0.2109
325.73	0.2104
326.15	0.2099
326.56	0.2095
326.98	0.209
327.39	0.2084
327.8	0.2079
328.22	0.2074
328.63	0.2069
329.05	0.2063
329.46	0.2058
329.88	0.2055
330.29	0.2048
330.71	0.2044
331.12	0.2039
331.54	0.2033
331.95	0.2028
332.37	0.2022
332.78	0.2019
333.2	0.2013
333.61	0.2008
334.03	0.2002
334.44	0.1999
334.85	0.1994
335.27	0.1989
335.68	0.1983
336.1	0.1979
336.51	0.1974
336.93	0.1969
337.34	0.1964
337.76	0.1959
338.17	0.1954
338.59	0.195
339	0.1945
339.42	0.194
339.83	0.1936
340.25	0.193
340.66	0.1926
341.08	0.1921
341.49	0.1916
341.91	0.1911
342.32	0.1906
342.73	0.1902
343.15	0.1897
343.56	0.1893
343.98	0.1888
344.39	0.1883
344.81	0.1879
345.22	0.1875
345.64	0.187
346.05	0.1864
346.47	0.186
346.88	0.1855
347.3	0.1851
347.71	0.1847
348.13	0.1841
348.54	0.1837
348.96	0.1832
349.37	0.1828
349.78	0.1824
350.2	0.1819
350.61	0.1815
351.03	0.181
351.44	0.1806
351.86	0.18
352.27	0.1797
352.69	0.1791
353.1	0.1787
353.52	0.1783
353.93	0.1778
354.35	0.1775
354.76	0.177
355.18	0.1766
355.59	0.1762
356.01	0.1759
356.42	0.1755
356.84	0.175
357.25	0.1747
357.66	0.1745
358.08	0.1741
358.49	0.1737
358.91	0.1733
359.32	0.173
359.74	0.1727
360.15	0.1722
360.57	0.1719
360.98	0.1715
361.4	0.1711
361.81	0.1708
362.23	0.1704
362.64	0.17
363.06	0.1697
363.47	0.1694
363.89	0.1689
364.3	0.1685
364.72	0.1682
365.13	0.1679
365.54	0.1675
365.96	0.1673
366.37	0.1669
366.79	0.1665
367.2	0.1662
367.62	0.1658
368.03	0.1655
368.45	0.1651
368.86	0.1647
369.28	0.1643
369.69	0.1641
370.11	0.1637
370.52	0.1633
370.94	0.1629
371.35	0.1626
371.77	0.1621
372.18	0.1618
372.6	0.1613
373.01	0.161
373.43	0.1605
373.84	0.1601
374.25	0.1596
374.67	0.1592
375.08	0.1588
375.5	0.1584
375.91	0.1579
376.33	0.1575
376.74	0.1571
377.16	0.1566
377.57	0.1562
377.99	0.1557
378.4	0.1553
378.82	0.155
379.23	0.1545
379.65	0.154
380.06	0.1536
380.48	0.1532
380.89	0.1528
381.31	0.1524
381.72	0.1519
382.14	0.1516
382.55	0.1511
382.97	0.1507
383.38	0.1503
383.8	0.1498
384.21	0.1493
384.62	0.1488
385.04	0.1484
385.45	0.148
385.87	0.1475
386.28	0.147
386.7	0.1465
387.11	0.1461
387.53	0.1457
387.94	0.1451
388.36	0.1447
388.77	0.1442
389.19	0.1435
389.6	0.1429
390.02	0.1424
390.43	0.1419
390.85	0.1413
391.26	0.1407
391.68	0.1402
392.09	0.1396
392.51	0.1391
392.92	0.1386
393.33	0.1381
393.75	0.1377
394.16	0.1371
394.58	0.1366
394.99	0.1362
395.41	0.1356
395.82	0.1352
396.24	0.1347
396.65	0.1342
397.07	0.1337
397.48	0.1334
397.9	0.1329
398.31	0.1325
398.73	0.132
399.14	0.1318
399.56	0.1314
399.97	0.1311
400.38	0.1308
400.8	0.1306
401.21	0.1303
401.63	0.1301
402.04	0.1299
402.46	0.1296
402.87	0.1295
403.29	0.1293
403.7	0.1292
404.12	0.1289
404.53	0.1289
404.95	0.1286
405.36	0.1284
405.77	0.1282
406.19	0.128
406.6	0.1278
407.02	0.1275
407.43	0.1272
407.85	0.127
408.26	0.1267
408.68	0.1265
409.09	0.1261
409.51	0.1258
409.92	0.1255
410.34	0.1252
410.75	0.1249
411.16	0.1245
411.58	0.1242
411.99	0.1239
412.41	0.1235
412.82	0.1233
413.24	0.123
413.65	0.1227
414.07	0.1225
414.48	0.1223
414.9	0.122
415.31	0.1218
415.73	0.1216
416.14	0.1213
416.55	0.1211
416.97	0.1208
417.38	0.1207
417.8	0.1204
418.21	0.1201
418.63	0.12
419.04	0.1197
419.46	0.1195
419.87	0.1193
420.29	0.1189
420.7	0.1187
421.11	0.1184
421.53	0.1181
421.94	0.1177
422.36	0.1174
422.77	0.1171
423.19	0.1167
423.6	0.1165
424.02	0.1162
424.43	0.1158
424.85	0.1155
425.26	0.1151
425.68	0.1148
426.09	0.1144
426.5	0.114
426.92	0.1136
427.33	0.1132
427.75	0.1129
428.16	0.1126
428.58	0.1121
428.99	0.1118
429.41	0.1114
429.82	0.111
430.24	0.1107
430.65	0.1104
431.06	0.1101
431.48	0.1098
431.89	0.1094
432.31	0.109
432.72	0.1087
433.14	0.1084
433.55	0.1081
433.97	0.1078
434.38	0.1074
434.8	0.1071
435.21	0.1069
435.62	0.1065
436.04	0.1061
436.45	0.1059
436.87	0.1056
437.28	0.1053
437.7	0.1049
438.11	0.1047
438.53	0.1043
438.94	0.1041
439.36	0.1038
439.77	0.1035
440.18	0.1033
440.6	0.103
441.01	0.1026
441.43	0.1023
441.84	0.102
442.26	0.1017
442.67	0.1015
443.09	0.1012
443.5	0.101
443.92	0.1006
444.33	0.1004
444.74	0.1002
445.16	0.0998
445.57	0.0995
445.99	0.0993
446.4	0.099
446.82	0.0988
447.23	0.0986
447.65	0.0982
448.06	0.0981
448.48	0.0977
448.89	0.0975
449.3	0.0973
449.72	0.097
450.13	0.0967
450.55	0.0965
450.96	0.0963
451.38	0.096
451.79	0.0958
452.21	0.0956
452.62	0.0953
453.03	0.095
453.45	0.0947
453.86	0.0944
454.28	0.0942
454.69	0.0941
455.11	0.094
455.52	0.0938
455.94	0.0935
456.35	0.0932
456.77	0.093
457.18	0.0927
457.59	0.0925
458.01	0.0922
458.42	0.092
458.84	0.0918
459.25	0.0915
459.67	0.0913
460.08	0.091
460.5	0.0908
460.91	0.0906
461.32	0.0904
461.74	0.0901
462.15	0.0899
462.57	0.0898
462.98	0.0895
463.4	0.0893
463.81	0.0891
464.23	0.0888
464.64	0.0887
465.05	0.0884
465.47	0.0881
465.88	0.0879
466.3	0.0878
466.71	0.0875
467.13	0.0874
467.54	0.0871
467.96	0.0869
468.37	0.0867
468.78	0.0865
469.2	0.0863
469.61	0.086
470.03	0.0859
470.44	0.0857
470.86	0.0855
471.27	0.0853
471.69	0.0851
472.1	0.0848
472.51	0.0846
472.93	0.0844
473.34	0.0842
473.76	0.084
474.17	0.0839
474.59	0.0837
475	0.0835
475.41	0.0833
475.83	0.0832
476.24	0.0829
476.66	0.0828
477.07	0.0827
477.49	0.0825
477.9	0.0825
478.32	0.0824
478.73	0.0822
479.14	0.0821
479.56	0.082
479.97	0.0818
480.39	0.0818
480.8	0.0818
481.22	0.0816
481.63	0.0815
482.05	0.0814
482.46	0.0813
482.87	0.0812
483.29	0.0811
483.7	0.0811
484.12	0.081
484.53	0.0808
484.95	0.0808
485.36	0.0807
485.77	0.0805
486.19	0.0806
486.6	0.0804
487.02	0.0804
487.43	0.0803
487.85	0.0801
488.26	0.0801
488.68	0.08
489.09	0.0799
489.5	0.0798
489.92	0.0797
490.33	0.0796
490.75	0.0794
491.16	0.0794
491.58	0.0793
491.99	0.0792
492.41	0.0791
492.82	0.079
493.23	0.0789
493.65	0.0787
494.06	0.0784
494.48	0.0783
494.89	0.0781
495.31	0.0779
495.72	0.0778
496.14	0.0775
496.55	0.0773
496.97	0.077
497.38	0.0768
497.79	0.0765
498.21	0.0762
498.62	0.0759
499.04	0.0756
499.45	0.0753
499.87	0.0752
500.28	0.075
500.7	0.0747
501.11	0.0745
501.52	0.0742
501.94	0.0741
502.35	0.0739
502.77	0.0737
503.18	0.0735
503.6	0.0734
504.01	0.0733
504.43	0.0731
504.84	0.073
505.25	0.0729
505.67	0.0728
506.08	0.0726
506.5	0.0725
506.91	0.0724
507.33	0.0722
507.74	0.0721
508.16	0.072
508.57	0.072
508.99	0.0719
509.4	0.0718
509.81	0.0717
510.23	0.0716
510.64	0.0715
511.06	0.0715
511.47	0.0713
511.89	0.0712
512.3	0.0712
512.72	0.0711
513.13	0.0709
513.55	0.0707
513.96	0.0707
514.37	0.0704
514.79	0.0703
515.2	0.0701
515.62	0.0699
516.03	0.0697
516.45	0.0695
516.86	0.0692
517.28	0.0689
517.69	0.0686
518.11	0.0684
518.52	0.0682
518.93	0.068
519.35	0.0678
519.76	0.0674
520.18	0.0671
520.59	0.0668
521.01	0.0665
521.42	0.0663
521.84	0.066
522.25	0.0657
522.67	0.0655
523.08	0.0652
523.49	0.0649
523.91	0.0647
524.32	0.0644
524.74	0.0642
525.15	0.0639
525.57	0.0637
525.98	0.0634
526.4	0.0631
526.81	0.0629
527.23	0.0626
527.64	0.0624
528.05	0.0621
528.47	0.0619
528.88	0.0617
529.3	0.0615
529.71	0.0612
530.13	0.061
530.54	0.0607
530.96	0.0604
531.37	0.0603
531.79	0.06
532.2	0.0599
532.61	0.0596
533.03	0.0594
533.44	0.0592
533.86	0.059
534.27	0.0589
534.69	0.0586
535.1	0.0584
535.52	0.0582
535.93	0.058
536.35	0.0578
536.76	0.0576
537.17	0.0574
537.59	0.0573
538	0.0572
538.42	0.0569
538.83	0.0567
539.25	0.0565
539.66	0.0564
540.08	0.0562
540.49	0.056
540.9	0.0559
541.32	0.0557
541.73	0.0555
542.15	0.0553
542.56	0.0552
542.98	0.055
543.39	0.0548
543.81	0.0547
544.22	0.0545
544.63	0.0543
545.05	0.0541
545.46	0.054
545.88	0.0538
546.29	0.0536
546.71	0.0535
547.12	0.0533
547.54	0.0531
547.95	0.053
548.36	0.0528
548.78	0.0527
549.19	0.0525
549.61	0.0524
550.02	0.0521
550.44	0.0521
550.85	0.0519
551.27	0.0517
551.68	0.0516
552.09	0.0514
552.51	0.0513
552.92	0.0511
553.34	0.051
553.75	0.0508
554.17	0.0506
554.58	0.0505
555	0.0504
555.41	0.0502
555.82	0.0501
556.24	0.0499
556.65	0.0497
557.07	0.0496
557.48	0.0494
557.9	0.0493
558.31	0.0491
558.73	0.049
559.14	0.0488
559.55	0.0487
559.97	0.0485
560.38	0.0484
560.8	0.0482
561.21	0.048
561.63	0.0478
562.04	0.0478
562.45	0.0476
562.87	0.0475
563.28	0.0474
563.7	0.0473
564.11	0.0472
564.53	0.0469
564.94	0.0469
565.36	0.0467
565.77	0.0466
566.18	0.0465
566.6	0.0462
567.01	0.0461
567.43	0.046
567.84	0.0458
568.26	0.0457
568.67	0.0455
569.08	0.0454
569.5	0.0453
569.91	0.0451
570.33	0.045
570.74	0.0449
571.16	0.0448
571.57	0.0446
571.98	0.0445
572.4	0.0443
572.81	0.0442
573.23	0.044
573.64	0.0439
574.06	0.0438
574.47	0.0437
574.88	0.0435
575.3	0.0433
575.71	0.0432
576.13	0.0431
576.54	0.0429
576.96	0.0428
577.37	0.0426
577.78	0.0424
578.2	0.0423
578.61	0.0421
579.03	0.0421
579.44	0.042
579.86	0.0418
580.27	0.0417
580.68	0.0415
581.1	0.0414
581.51	0.0413
581.93	0.0412
582.34	0.0411
582.76	0.0409
583.17	0.0407
583.58	0.0406
584	0.0404
584.41	0.0403
584.83	0.0402
585.24	0.04
585.66	0.0399
586.07	0.0398
586.48	0.0397
586.9	0.0394
587.31	0.0394
587.73	0.0392
588.14	0.0391
588.56	0.039
588.97	0.0388
589.38	0.0388
589.8	0.0386
590.21	0.0384
590.63	0.0383
591.04	0.0382
591.46	0.0381
591.87	0.0379
592.28	0.0379
592.7	0.0377
593.11	0.0376
593.53	0.0374
593.94	0.0373
594.36	0.0372
594.77	0.0371
595.18	0.0369
595.6	0.0367
596.01	0.0367
596.43	0.0365
596.84	0.0364
597.26	0.0363
597.67	0.0361
598.08	0.0359
598.5	0.0359
598.91	0.0358
599.33	0.0356
599.74	0.0354
600.15	0.0353
600.57	0.0352
600.98	0.035
601.4	0.0349
601.81	0.0348
602.23	0.0347
602.64	0.0346
603.05	0.0345
603.47	0.0343
603.88	0.0342
604.3	0.0341
604.71	0.0339
605.13	0.0338
605.54	0.0336
605.95	0.0336
606.37	0.0334
606.78	0.0334
607.2	0.0332
607.61	0.033
608.03	0.033
608.44	0.0328
608.85	0.0326
609.27	0.0326
609.68	0.0323
610.1	0.0323
610.51	0.0322
610.92	0.032
611.34	0.032
611.75	0.0319
612.17	0.0317
612.58	0.0316
613	0.0314
613.41	0.0314
613.82	0.0312
614.24	0.0312
614.65	0.0309
615.07	0.0309
615.48	0.0307
615.9	0.0306
616.31	0.0304
616.72	0.0304
617.14	0.0302
617.55	0.0301
617.97	0.0299
618.38	0.0298
618.79	0.0298
619.21	0.0296
619.62	0.0295
620.04	0.0294
620.45	0.0293
620.87	0.0292
621.28	0.0291
621.69	0.0289
622.11	0.0289
622.52	0.0287
622.94	0.0286
623.35	0.0285
623.77	0.0283
624.18	0.0282
624.59	0.0281
625.01	0.028
625.42	0.0279
625.84	0.0277
626.25	0.0276
626.66	0.0276
627.08	0.0274
627.49	0.0273
627.91	0.0272
628.32	0.0271
628.74	0.0269
629.15	0.0268
629.56	0.0268
629.98	0.0266
630.39	0.0266
630.81	0.0264
631.22	0.0263
631.64	0.0262
632.05	0.026
632.46	0.0259
632.88	0.0258
633.29	0.0257
633.71	0.0256
634.12	0.0255
634.54	0.0254
634.95	0.0252
635.36	0.0251
635.78	0.0251
636.19	0.0248
636.61	0.0247
637.02	0.0247
637.43	0.0246
637.85	0.0244
638.26	0.0243
638.68	0.0242
639.09	0.0241
639.51	0.0239
639.92	0.0239
640.33	0.0238
640.75	0.0236
641.16	0.0236
641.58	0.0234
641.99	0.0233
642.4	0.0232
642.82	0.023
643.23	0.023
643.65	0.0229
644.06	0.0227
644.48	0.0226
644.89	0.0225
645.3	0.0224
645.72	0.0223
646.13	0.0222
646.55	0.0221
646.96	0.022
647.37	0.0219
647.79	0.0218
648.2	0.0216
648.62	0.0216
649.03	0.0214
649.45	0.0213
649.86	0.0213
650.27	0.0211
650.69	0.0211
651.1	0.021
651.52	0.0209
651.93	0.0209
652.35	0.0208
652.76	0.0207
653.17	0.0206
653.59	0.0206
654	0.0204
654.42	0.0202
654.83	0.0202
655.24	0.0201
655.66	0.0199
656.07	0.0198
656.49	0.0197
656.9	0.0197
657.32	0.0195
657.73	0.0194
658.14	0.0192
658.56	0.0192
658.97	0.0191
659.39	0.019
659.8	0.0188
660.21	0.0187
660.63	0.0187
661.04	0.0185
661.46	0.0185
661.87	0.0183
662.29	0.0182
662.7	0.0181
663.11	0.018
663.53	0.0179
663.94	0.0177
664.36	0.0176
664.77	0.0175
665.18	0.0174
665.6	0.0174
666.01	0.0172
666.43	0.0171
666.84	0.017
667.26	0.0168
667.67	0.0167
668.08	0.0167
668.5	0.0166
668.91	0.0165
669.33	0.0165
669.74	0.0163
670.15	0.0162
670.57	0.0161
670.98	0.0159
671.4	0.0159
671.81	0.0157
672.22	0.0157
672.64	0.0155
673.05	0.0154
673.47	0.0154
673.88	0.0152
674.3	0.0151
674.71	0.015
675.12	0.0149
675.54	0.0148
675.95	0.0146
676.37	0.0146
676.78	0.0145
677.19	0.0145
677.61	0.0143
678.02	0.0142
678.44	0.0141
678.85	0.014
679.26	0.0139
679.68	0.0139
680.09	0.0138
680.51	0.0138
680.92	0.0137
681.34	0.0138
681.75	0.0137
682.16	0.0137
682.58	0.0137
682.99	0.0136
683.41	0.0137
683.82	0.0137
684.23	0.0137
684.65	0.0137
685.06	0.0137
685.48	0.0136
685.89	0.0136
686.3	0.0136
686.72	0.0135
687.13	0.0136
687.55	0.0135
687.96	0.0135
688.38	0.0135
688.79	0.0134
689.2	0.0134
689.62	0.0132
690.03	0.0132
690.45	0.013
690.86	0.0129
691.27	0.0129
691.69	0.0127
692.1	0.0126
692.52	0.0126
692.93	0.0124
693.35	0.0122
693.76	0.0122
694.17	0.012
694.59	0.012
695	0.0118
695.42	0.0118
695.83	0.0115
696.25	0.0114
696.66	0.0113
697.07	0.0112
697.49	0.011
697.9	0.0108
698.32	0.0107
698.73	0.0105
699.14	0.0104
699.56	0.0103
699.92	0.01
